# Supplementary material
Source: PubMed Central journal article supplement (PMC11626257)
Supplement: ajcr0014-5351-f5.pdf [file ajcr0014-5351-f5.pdf]

## Updated analysis of tislelizumab plus fruquintinib and FMT in MSS mCRC

**Table S1.** Baseline characteristics of mCRC patients in real-world third-line or above immunotherapy-based treatment (n = 94)

| Characteristics                          | Patients, No. (%) |
|------------------------------------------|-------------------|
| Age, median (IQR), years                 | 59 (51-66)        |
| > 60                                     | 38 (40.4)         |
| ≤ 60                                     | 56 (59.6)         |
| Sex                                      |                   |
| Male                                     | 63 (67.0)         |
| Female                                   | 31 (33.0)         |
| ECOG PS                                  |                   |
| 0-1                                      | 88 (93.6)         |
| 2                                        | 6 (6.4)           |
| Primary tumor site                       |                   |
| Left-sided                               | 76 (80.9)         |
| Right-sided                              | 18 (19.1)         |
| Type of metastasis                       |                   |
| With liver metastasis                    | 62 (66.0)         |
| With lung metastasis                     | 57 (60.6)         |
| Previous treatment                       |                   |
| Surgery                                  | 75 (79.8)         |
| Radiotherapy                             | 42(44.7)          |
| Chemotherapy                             | 94 (100.0)        |
| Anti-VEGF(R) therapy                     | 83 (88.3)         |
| Anti-EGFR therapy                        | 19 (20.2)         |
| Lines of prior treatment                 |                   |
| 2                                        | 53 (56.4)         |
| ≥ 3                                      | 41 (43.6)         |
| Current treatment patterns               |                   |
| ICI alone                                | 6 (6.4)           |
| ICI+CT±RT                                | 7 (7.4)           |
| ICI+anti-VEGF(R)/EGFR/HER2 mAb±CT±RT     | 24 (25.5)         |
| ICI+TKI±CT±RT <sup>a</sup>               | 55 (58.5)         |
| ICI+anti-VEGF(R)/EGFR/HER2 mAb+TKI±CT±RT | 2 (2.1)           |
| RAS/BRAF gene status                     |                   |
| WT                                       | 28 (29.8)         |
| MT                                       | 41 (43.6)         |
| Unknown                                  | 25 (26.6)         |
| MSI status                               |                   |
| MSS/pMMR                                 | 94 (100.0)        |

Abbreviations: CT, chemotherapy; ECOG PS, Eastern Cooperative Oncology Group performance status; EGFR, epidermal growth factor receptor; ICI, immune checkpoint inhibitor; IQR, interquartile range; mAb, monoclonal antibody; MSI, microsatellite instability; MSS, microsatellite stable; MT, mutated type; pMMR, mismatch repair proficient; RT, radiotherapy; TKI, tyrosine kinase inhibitor; VEGF(R), vascular endothelial growth factor (receptor); WT, wild type. <sup>a</sup>TKI: VEGFRi (Regorafenib, Fruquintinib, Sulfatinib, Apatinib, Anlotinib), BRAFi (Dabrafenib, Vemurafenib), MEKi (Trametinib), HER2i (Pyrotinib, Lapatinib, Tucatinib), ALKi (Lorlatinib).

Updated analysis of tislelizumab plus fruquintinib and FMT in MSS mCRC

**Table S2.** Multivariate survival analysis after variable selection for OS (n = 20)

| Variable                 | Multivariate assay for OS<br>HR (95% CI) | P      |
|--------------------------|------------------------------------------|--------|
| ECOG performance status  |                                          |        |
| 0-1 vs 2                 | 0.31 (0.061-1.58)                        | 0.16   |
| Liver metastasis         |                                          |        |
| Yes vs No                | 2.59 (0.62-10.80)                        | 0.19   |
| Prior surgery            |                                          |        |
| Yes vs No                | 0.16 (0.029-0.90)                        | 0.037* |
| Prior VEGF(R) inhibitors |                                          |        |
| Yes vs No                | 3.49 (0.67-18.12)                        | 0.14   |
| Prior radiotherapy       |                                          |        |
| Yes vs No                | 0.88 (0.26-2.98)                         | 0.84   |
| Prior regorafenib        |                                          |        |
| Yes vs No                | 1.19 (0.28-4.99)                         | 0.81   |

CI, confidence interval; ECOG, Eastern Cooperative Oncology Group; HR, hazard ratio; OS, overall survival. \* $P < 0.05$ .

# Updated analysis of tislelizumab plus fruquintinib and FMT in MSS mCRC

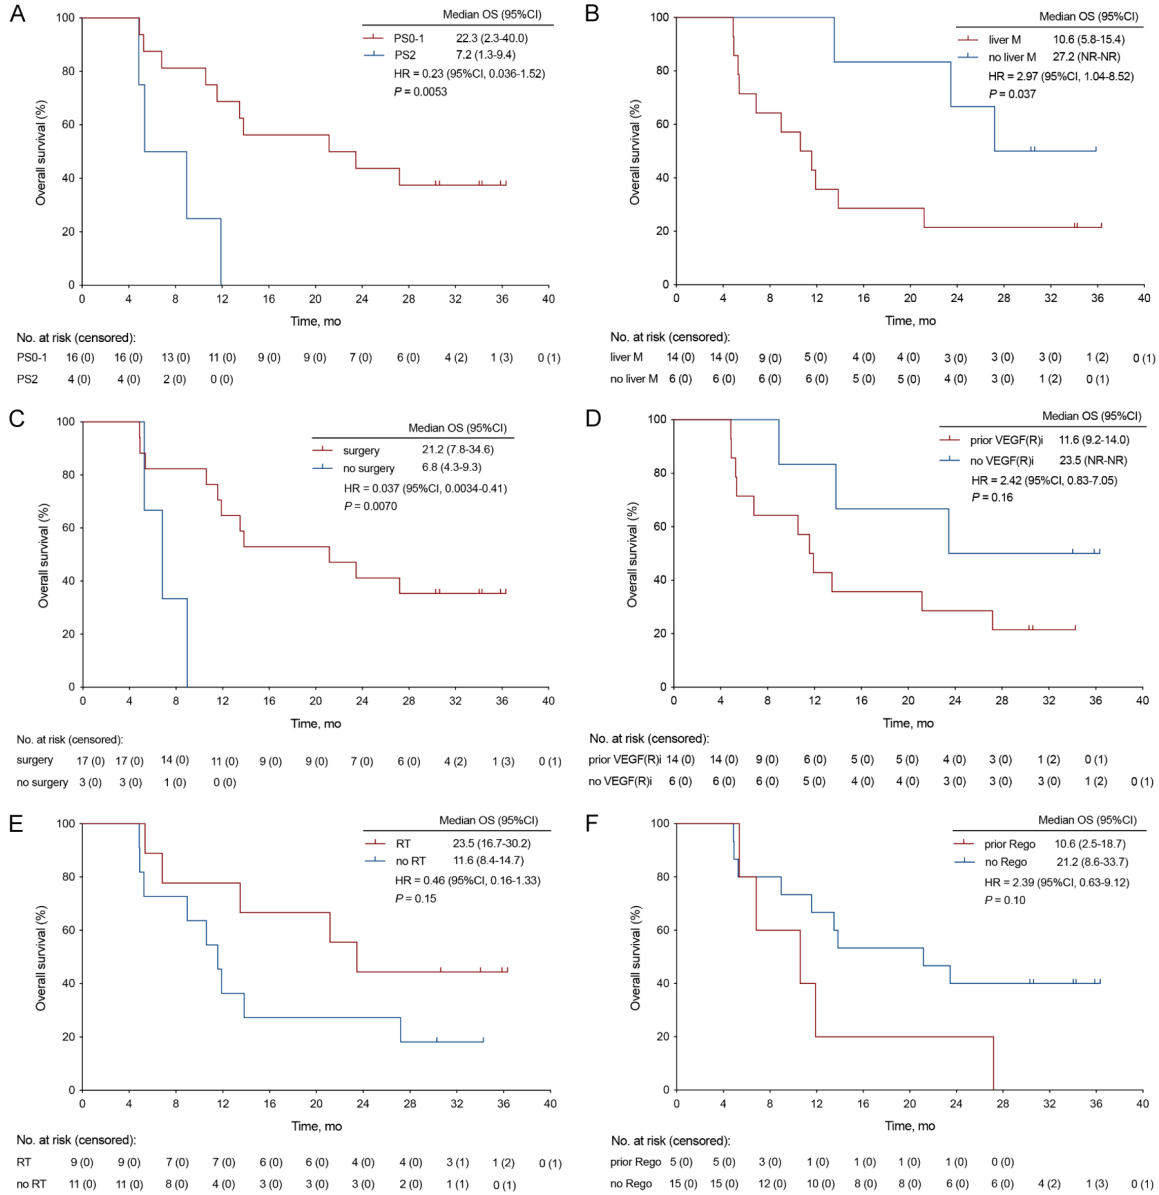

**Figure S1.** Subgroup analysis of Kaplan-Meier curves for overall survival. CI, confidence interval; HR, hazard ratio; OS, overall survival; RT, radiotherapy; Rego, regorafenib; VEGF(R)i, vascular endothelial growth factor (receptor) inhibitor; liver M, liver metastasis; PS, (ECOG) performance status.

# Updated analysis of tislelizumab plus fruquintinib and FMT in MSS mCRC

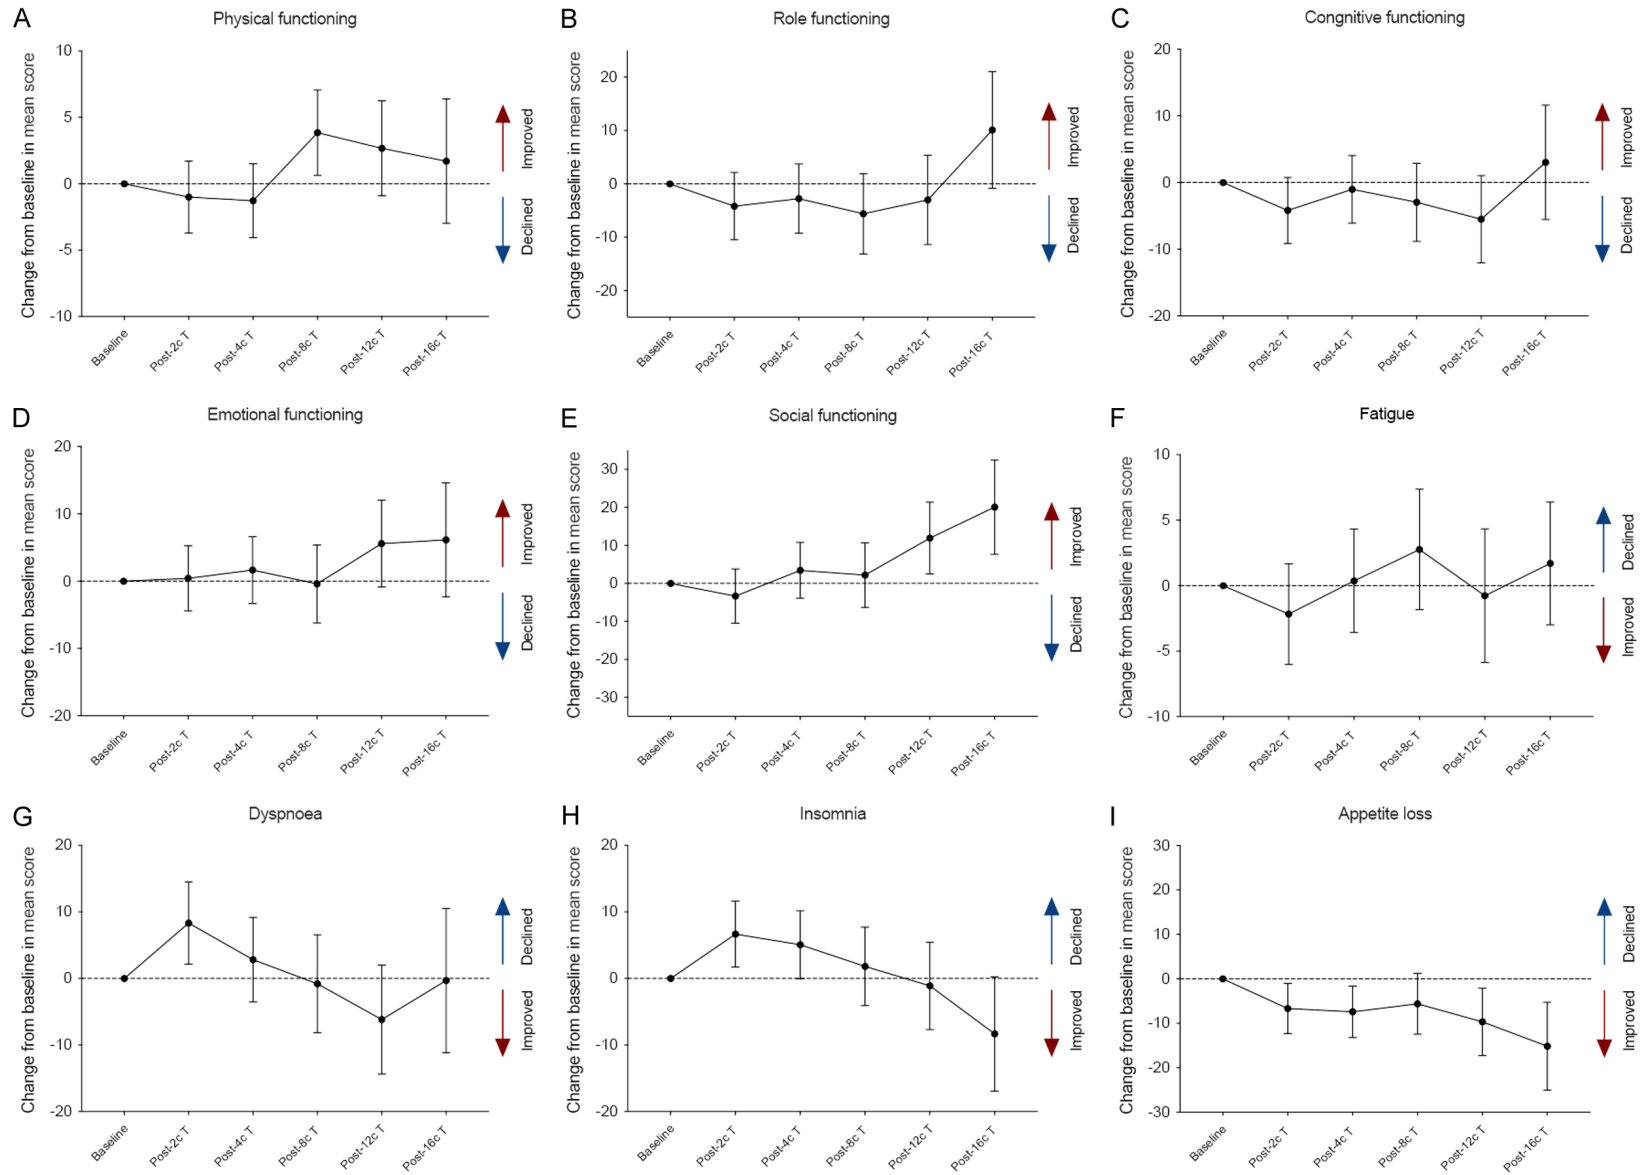

# Updated analysis of tislelizumab plus fruquintinib and FMT in MSS mCRC

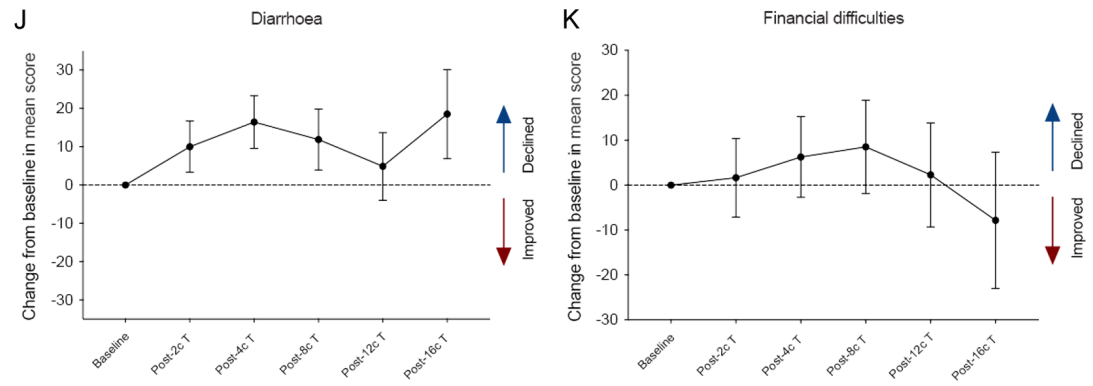

**Figure S2.** LSM change of other functional and symptom scale in EORTC QLQ-C30. LSM, least-squares mean; European Organization for the Research and Treatment of Cancer Quality of Life Questionnaire Core 30.

Updated analysis of tislelizumab plus fruquintinib and FMT in MSS mCRC

**Table S3.** Mean change of EORTC QLQ-C30 GHS/QoL, functional and symptom scale scores

| Items                        | Completed questionnaire | Mean ± SD   | LSM change ± SD from baseline<br>(95% CI) <sup>a</sup> | P      |
|------------------------------|-------------------------|-------------|--------------------------------------------------------|--------|
| <b>GHS/QoL</b>               |                         |             |                                                        |        |
| Baseline                     | 20                      | 57.51±3.44  | -                                                      | -      |
| Post-2 cycles                | 20                      | 59.26±3.44  | 1.75±4.87 (-7.96~11.47)                                | 0.720  |
| Post-4 cycles                | 18                      | 69.64±3.68  | 12.13±5.04 (2.09~22.18)                                | 0.019* |
| Post-8 cycles                | 11                      | 67.67±4.64  | 10.16±5.77 (-1.36~21.68)                               | 0.083  |
| Post-12 cycles               | 8                       | 63.24±5.50  | 5.73±6.48 (-7.21~18.67)                                | 0.380  |
| Post-16 cycles               | 4                       | 73.83±8.70  | 16.32±9.36 (-2.36~34.99)                               | 0.086  |
| <b>Physical functioning</b>  |                         |             |                                                        |        |
| Baseline                     | 20                      | 82.38±1.91  | -                                                      | -      |
| Post-2 cycles                | 20                      | 81.38±1.91  | -1.00±2.70 (-6.38~4.38)                                | 0.712  |
| Post-4 cycles                | 18                      | 81.10±2.01  | -1.28±2.78 (-6.81~4.25)                                | 0.646  |
| Post-8 cycles                | 11                      | 86.23±2.58  | 3.86±3.21 (-2.53~10.25)                                | 0.233  |
| Post-12 cycles               | 8                       | 85.05±3.02  | 2.67±3.58 (-4.45~9.80)                                 | 0.457  |
| Post-16 cycles               | 4                       | 84.08±4.27  | 1.71±4.68 (-7.62~11.03)                                | 0.717  |
| <b>Role functioning</b>      |                         |             |                                                        |        |
| Baseline                     | 20                      | 86.77±4.47  | -                                                      | -      |
| Post-2 cycles                | 20                      | 82.60±4.47  | -4.17±6.31 (-16.75~8.41)                               | 0.511  |
| Post-4 cycles                | 18                      | 84.00±4.71  | -2.77±6.49 (-15.70~10.16)                              | 0.671  |
| Post-8 cycles                | 11                      | 81.16±6.03  | -5.61±7.51 (-20.56~9.35)                               | 0.458  |
| Post-12 cycles               | 8                       | 83.78±7.06  | -2.99±8.35 (-19.63~13.66)                              | 0.722  |
| Post-16 cycles               | 4                       | 96.86±9.99  | 10.09±10.95 (-11.72~31.90)                             | 0.360  |
| <b>Cognitive functioning</b> |                         |             |                                                        |        |
| Baseline                     | 20                      | 81.68±3.49  | -                                                      | -      |
| Post-2 cycles                | 20                      | 77.51±3.49  | -4.17±4.94 (-14.01~5.67)                               | 0.402  |
| Post-4 cycles                | 18                      | 80.67±3.68  | -1.01±5.07 (-11.12~9.10)                               | 0.843  |
| Post-8 cycles                | 11                      | 78.72±4.71  | -2.96±5.86 (-14.64~8.72)                               | 0.615  |
| Post-12 cycles               | 8                       | 76.18±5.52  | -5.50±6.54 (-18.52~7.52)                               | 0.403  |
| Post-16 cycles               | 4                       | 84.72±7.81  | 3.04±8.56 (-14.01~20.09)                               | 0.723  |
| <b>Emotional functioning</b> |                         |             |                                                        |        |
| Baseline                     | 20                      | 84.05±3.44  | -                                                      | -      |
| Post-2 cycles                | 20                      | 84.47±3.44  | 0.42±4.85 (-9.25~10.08)                                | 0.932  |
| Post-4 cycles                | 18                      | 85.71±3.62  | 1.66±4.98 (-8.27~11.59)                                | 0.740  |
| Post-8 cycles                | 11                      | 83.64±4.64  | -0.41±5.79 (-11.94~11.12)                              | 0.943  |
| Post-12 cycles               | 8                       | 89.64±5.43  | 5.59±6.43 (-7.23~18.40)                                | 0.388  |
| Post-16 cycles               | 4                       | 90.20±7.72  | 6.16±8.47 (-10.73~23.04)                               | 0.470  |
| <b>Social functioning</b>    |                         |             |                                                        |        |
| Baseline                     | 20                      | 64.25±5.05  | -                                                      | -      |
| Post-2 cycles                | 20                      | 60.92±5.05  | -3.33±7.13 (-17.55~10.88)                              | 0.642  |
| Post-4 cycles                | 18                      | 67.71±5.32  | 3.45±7.33 (-11.16~18.06)                               | 0.639  |
| Post-8 cycles                | 11                      | 66.46±6.81  | 2.21±8.48 (-14.69~19.10)                               | 0.796  |
| Post-12 cycles               | 8                       | 76.19±7.98  | 11.93±9.44 (-6.88~30.75)                               | 0.210  |
| Post-16 cycles               | 4                       | 84.33±11.29 | 20.08±12.38 (-4.58~44.74)                              | 0.109  |

## Updated analysis of tislelizumab plus fruquintinib and FMT in MSS mCRC

|                            |    |            |                            |         |
|----------------------------|----|------------|----------------------------|---------|
| <b>Fatigue</b>             |    |            |                            |         |
| Baseline                   | 20 | 30.26±2.73 | -                          | -       |
| Post-2 cycles              | 20 | 28.10±2.73 | -2.17±3.84 (-9.83~5.49)    | 0.576   |
| Post-4 cycles              | 18 | 30.64±2.87 | 0.37±3.95 (-7.51~8.25)     | 0.925   |
| Post-8 cycles              | 11 | 33.03±3.68 | 2.77±4.59 (-6.39~11.92)    | 0.549   |
| Post-12 cycles             | 8  | 29.50±4.31 | -0.76±5.11 (-10.94~9.42)   | 0.882   |
| Post-16 cycles             | 4  | 28.66±6.13 | -1.61±6.73 (-15.02~11.81)  | 0.812   |
| <b>Nausea and vomiting</b> |    |            |                            |         |
| Baseline                   | 20 | 13.68±3.24 | -                          | -       |
| Post-2 cycles              | 20 | 8.34±3.24  | -5.33±4.59 (-14.47~3.81)   | 0.249   |
| Post-4 cycles              | 18 | 7.34±3.42  | -6.34±4.71 (-15.73~3.05)   | 0.183   |
| Post-8 cycles              | 11 | 6.28±4.37  | -7.39±5.45 (-18.25~3.46)   | 0.179   |
| Post-12 cycles             | 8  | 0.09±5.13  | -13.59±6.07 (-25.68~-1.50) | 0.028*  |
| Post-16 cycles             | 4  | 4.44±7.29  | -9.23±7.99 (-25.16~6.69)   | 0.252   |
| <b>Pain</b>                |    |            |                            |         |
| Baseline                   | 20 | 26.84±3.81 | -                          | -       |
| Post-2 cycles              | 20 | 23.51±3.81 | -3.33±5.39 (-14.07~7.41)   | 0.538   |
| Post-4 cycles              | 18 | 15.08±4.02 | -11.76±5.54 (-22.80~-0.72) | 0.037*  |
| Post-8 cycles              | 11 | 4.94±5.14  | -21.9±6.40 (-34.66~9.14)   | 0.001** |
| Post-12 cycles             | 8  | 14.05±6.04 | -12.80±7.14 (-27.03~1.44)  | 0.077   |
| Post-16 cycles             | 4  | 5.36±8.53  | -21.48±9.34 (-40.09~-2.88) | 0.024*  |
| <b>Dyspnoea</b>            |    |            |                            |         |
| Baseline                   | 20 | 16.57±4.37 | -                          | -       |
| Post-2 cycles              | 20 | 24.90±4.37 | 8.33±6.19 (-3.99~20.66)    | 0.182   |
| Post-4 cycles              | 18 | 19.38±4.61 | 2.81±6.36 (-9.86~15.48)    | 0.659   |
| Post-8 cycles              | 11 | 15.78±5.90 | -0.79±7.34 (-15.42~13.85)  | 0.915   |
| Post-12 cycles             | 8  | 10.40±6.93 | -6.17±8.19 (-22.50~10.15)  | 0.454   |
| Post-16 cycles             | 4  | 16.26±9.90 | -0.31±10.83 (-21.89~21.27) | 0.977   |
| <b>Insomnia</b>            |    |            |                            |         |
| Baseline                   | 20 | 15.61±3.51 | -                          | -       |
| Post-2 cycles              | 20 | 22.28±3.51 | 6.67±4.96 (-3.21~16.54)    | 0.183   |
| Post-4 cycles              | 18 | 20.67±3.70 | 5.06±5.10 (-5.09~15.21)    | 0.324   |
| Post-8 cycles              | 11 | 17.43±4.73 | 1.82±5.89 (-9.93~13.56)    | 0.759   |
| Post-12 cycles             | 8  | 14.50±5.55 | -1.11±6.56 (-14.19~11.97)  | 0.866   |
| Post-16 cycles             | 4  | 7.28±7.84  | -8.33±8.59 (-25.44~8.77)   | 0.335   |
| <b>Appetite loss</b>       |    |            |                            |         |
| Baseline                   | 20 | 25.51±4.01 | -                          | -       |
| Post-2 cycles              | 20 | 18.85±4.01 | -6.67±5.64 (-17.90~4.57)   | 0.241   |
| Post-4 cycles              | 18 | 18.10±4.20 | -7.42±5.81 (-18.99~4.15)   | 0.205   |
| Post-8 cycles              | 11 | 19.89±5.43 | -5.62±6.80 (-19.17~7.93)   | 0.411   |
| Post-12 cycles             | 8  | 15.85±6.35 | -9.67±7.55 (-24.71~5.38)   | 0.204   |
| Post-16 cycles             | 4  | 10.37±8.97 | -15.14±9.87 (-34.82~4.53)  | 0.129   |
| <b>Constipation</b>        |    |            |                            |         |
| Baseline                   | 20 | 23.46±3.93 | -                          | -       |
| Post-2 cycles              | 20 | 11.79±3.93 | -11.67±5.54 (-22.71~-0.62) | 0.039*  |
| Post-4 cycles              | 18 | 16.67±4.13 | -6.79±5.70 (-18.15~4.57)   | 0.237   |
| Post-8 cycles              | 11 | 19.08±5.33 | -4.38±6.66 (-17.64~8.88)   | 0.512   |
| Post-12 cycles             | 8  | 19.75±6.22 | -3.71±7.38 (-18.41~11.00)  | 0.617   |
| Post-16 cycles             | 4  | 15.12±8.77 | -8.33±9.60 (-27.46~10.80)  | 0.388   |

## Updated analysis of tislelizumab plus fruquintinib and FMT in MSS mCRC

|                               |    |             |                            |        |
|-------------------------------|----|-------------|----------------------------|--------|
| <b>Diarrhoea</b>              |    |             |                            |        |
| Baseline                      | 20 | 10.21±4.73  | -                          | -      |
| Post-2 cycles                 | 20 | 20.21±4.73  | 10.00±6.69 (-3.33~23.33)   | 0.139  |
| Post-4 cycles                 | 18 | 26.67±4.99  | 16.46±6.87 (2.77~30.15)    | 0.019* |
| Post-8 cycles                 | 11 | 22.08±6.38  | 11.87±7.94 (-3.95~27.69)   | 0.139  |
| Post-12 cycles                | 8  | 15.07±7.49  | 4.87±8.86 (-12.78~22.51)   | 0.584  |
| Post-16 cycles                | 4  | 28.74±10.62 | 18.53±11.63 (-4.64~41.70)  | 0.115  |
| <b>Financial difficulties</b> |    |             |                            |        |
| Baseline                      | 20 | 53.17±6.19  | -                          | -      |
| Post-2 cycles                 | 20 | 54.83±6.19  | 1.67±8.76 (-15.78~19.11)   | 0.850  |
| Post-4 cycles                 | 18 | 59.44±6.53  | 6.28±9.00 (-11.66~24.21)   | 0.488  |
| Post-8 cycles                 | 11 | 61.67±8.35  | 8.50±10.40 (-12.21~29.21)  | 0.416  |
| Post-12 cycles                | 8  | 55.45±9.79  | 2.28±11.59 (-20.80~25.36)  | 0.844  |
| Post-16 cycles                | 4  | 45.36±13.86 | -7.81±15.18 (-38.06~22.45) | 0.609  |

Data are n, mean ± SD, or LSM ± SD (95% CI). Error bars indicate 95% CIs around the mean. *P* values are two-sided and nominal and \**P* < 0.05, \*\**P* < 0.01. Higher scores in functional scale (physical, social, role, cognitive, and emotional functioning) represent better health status and functioning, and higher scores in symptom scale (fatigue, dyspnoea, appetite loss, insomnia, diarrhoea, and financial difficulties) indicate increased symptom severity. CI, confidence interval; EORTC QLQ-C30, European Organization for the Research and Treatment of Cancer Quality of Life Questionnaire Core 30; GHS, global health status; HRQoL, health-related quality of life; LSM, least-squares mean; SD, standard deviation. <sup>a</sup>Based on a univariate analysis model with HRQoL item scores as the dependent variable, and treatment by study visit interaction as covariates. Analysis with constrained longitudinal data analysis model involved patients with at least one baseline or post-baseline assessment for the HRQoL score being analyzed.



# Updated analysis of tislelizumab plus fruquintinib and FMT in MSS mCRC

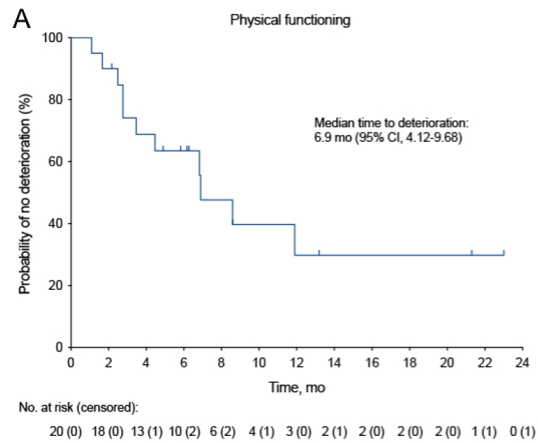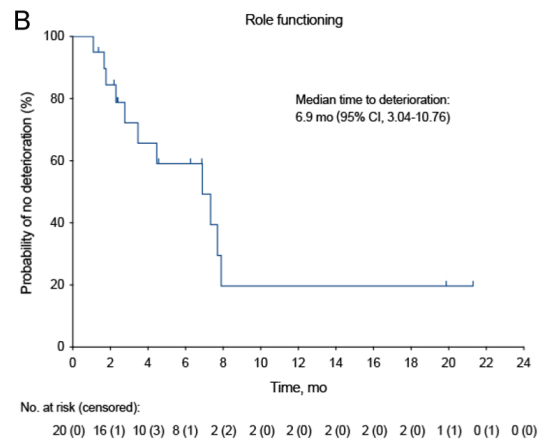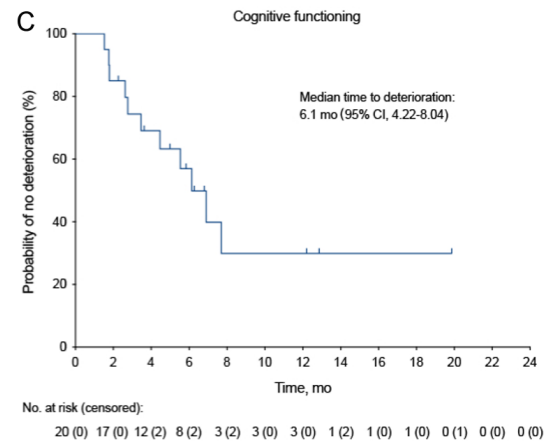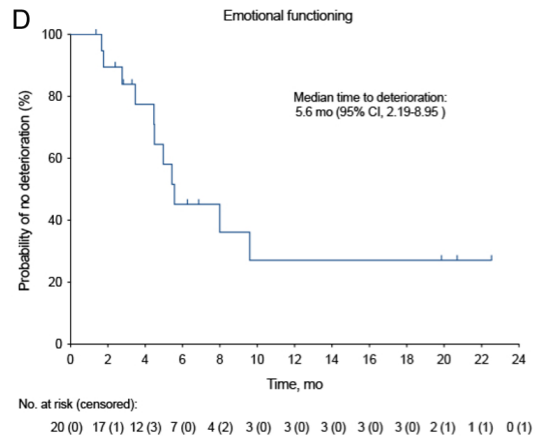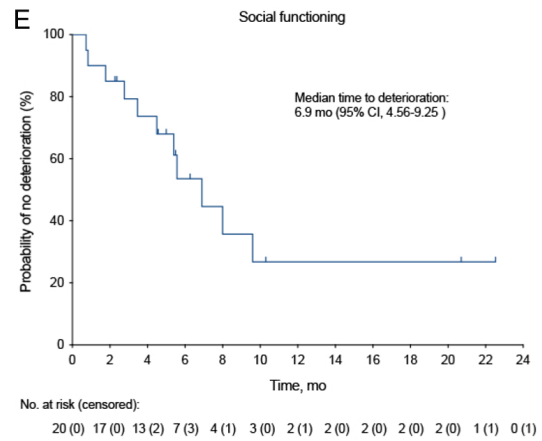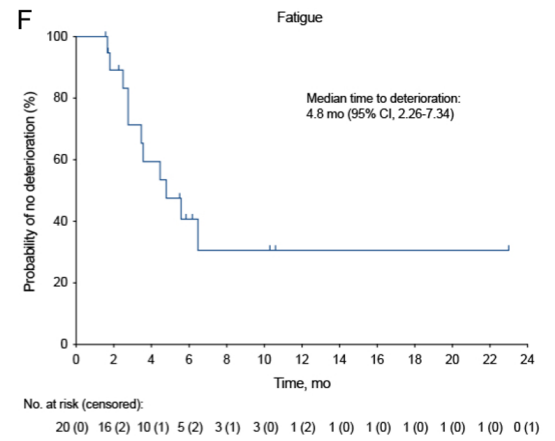

## Updated analysis of tislelizumab plus fruquintinib and FMT in MSS mCRC

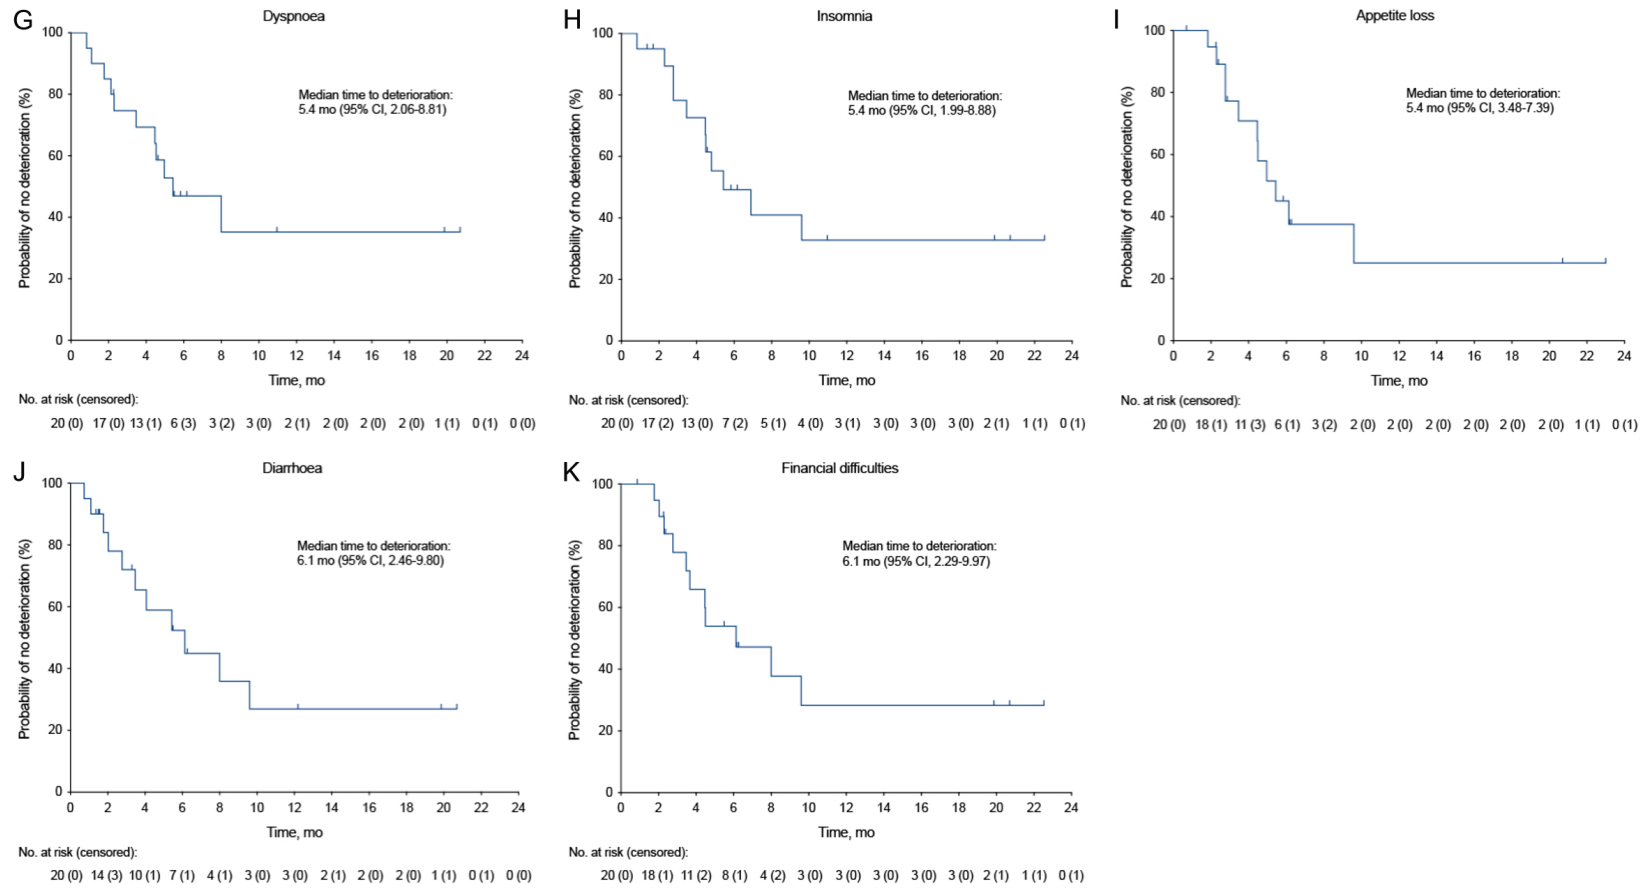

**Figure S3.** Kaplan-Meier curves of time to deterioration in other EORTC QLQ-C30 item scores. European Organization for the Research and Treatment of Cancer Quality of Life Questionnaire Core 30.

## Updated analysis of tislelizumab plus fruquintinib and FMT in MSS mCRC

**Table S4.** Mean change of EQ-5D-3L VAS and health utility scores

| Items                         | Completed questionnaire | Mean $\pm$ SD     | LSM change $\pm$ SD from baseline (95% CI) | <i>P</i> |
|-------------------------------|-------------------------|-------------------|--------------------------------------------|----------|
| EQ-5D-3L VAS score            |                         |                   |                                            |          |
| Baseline                      | 20                      | 55.65 $\pm$ 13.25 | -                                          | -        |
| Post-2 cycles                 | 20                      | 59.55 $\pm$ 18.27 | 3.90 $\pm$ 3.71 (-3.50~11.30)              | 0.297    |
| Post-4 cycles                 | 18                      | 63.06 $\pm$ 19.07 | 5.26 $\pm$ 3.82 (-2.36~12.88)              | 0.173    |
| Post-8 cycles                 | 11                      | 70.91 $\pm$ 11.61 | 10.09 $\pm$ 4.45 (1.22~18.96)              | 0.026*   |
| Post-12 cycles                | 8                       | 66.75 $\pm$ 16.84 | 7.39 $\pm$ 4.93 (-2.44~17.22)              | 0.138    |
| Post-16 cycles                | 4                       | 68.75 $\pm$ 6.29  | 7.64 $\pm$ 6.47 (-5.25~20.52)              | 0.241    |
| EQ-5D-3L health utility score |                         |                   |                                            |          |
| Baseline                      | 20                      | 0.58 $\pm$ 0.22   | -                                          | -        |
| Post-2 cycles                 | 20                      | 0.61 $\pm$ 0.22   | 0.03 $\pm$ 0.04 (-0.04~0.10)               | 0.375    |
| Post-4 cycles                 | 18                      | 0.62 $\pm$ 0.27   | 0.02 $\pm$ 0.04 (-0.05~0.10)               | 0.550    |
| Post-8 cycles                 | 11                      | 0.74 $\pm$ 0.12   | 0.10 $\pm$ 0.04 (0.02~0.19)                | 0.017*   |
| Post-12 cycles                | 8                       | 0.69 $\pm$ 0.24   | 0.10 $\pm$ 0.05 (0.00~0.19)                | 0.047*   |
| Post-16 cycles                | 4                       | 0.75 $\pm$ 0.04   | 0.11 $\pm$ 0.06 (-0.01~0.23)               | 0.082    |

Data are n, mean  $\pm$  SD, or LSM  $\pm$  SD (95% CI). *P* values are two-sided and nominal and \**P* < 0.05. CI, confidence interval; EQ-5D-3L, EuroQoL 5 Dimensions 3 Levels; LSM, least-squares mean; SD, standard deviation; VAS, visual analogue scale.
